# Supplementary material for: Prediction of half-semiconductor antiferromagnets with vanishing net magnetization
Source: Royal Society of Chemistry journal article supplement (doi:10.1039/c5ra05257b), 2015-01-01
Supplement: c5ra05257b1.pdf [file c5ra05257b1.pdf]

**Supplementary information**  
**for “Prediction of Half-Semiconductor**  
**Antiferromagnets with vanishing net**  
**Magnetization”**

Junjie He<sup>ab</sup>, Pan Zhou<sup>a</sup>, N. Jiao, Xiaoshuang Chen<sup>c</sup>, and Wei Lu<sup>c</sup>, L. Z. Sun<sup>\*a</sup>

†

*<sup>a</sup>Hunan Provincial Key laboratory of Thin Film Materials and Devices,*

*School of Material Sciences and Engineering, Xiangtan University, Xiangtan*

*411105, China*

*<sup>b</sup>Department of Physical and Macromolecular Chemistry, Faculty of Science,*

*Charles University in Prague, 128 43 Prague 2, Czech Republic*

*<sup>c</sup>National Laboratory for Infrared Physics, Shanghai Institute of Technical*

*Physics, Chinese Academy of Sciences, Shanghai, 200083, China*

E-mail: [lzsun@xtu.edu.cn](mailto:lzsun@xtu.edu.cn)

---

\* To whom correspondence should be addressed

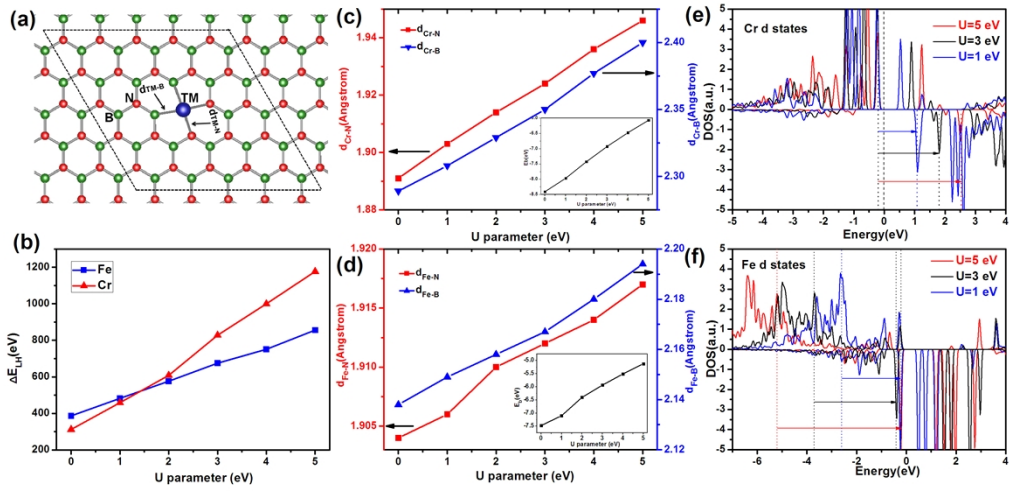

Figure S1 (a)The structure of single TM(Cr and Fe) doped BN sheet. (b) the energy difference between low spin states and high spin states for Cr and Fe, respectively with respect to U parameter. (c) and (d) represent the bond length(Fe-B, Fe-N, Cr-B and Cr-N ) corresponding to the changing U parameter, where insert picture denoted the bind energy with U parameter for Cr and Fe, respectively. The PDOS for d states of Cr(e) and Fe (f) is in some typical U value.The Fermi level is set to zero.

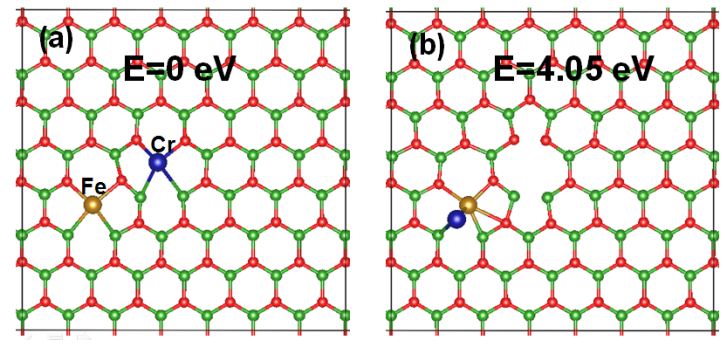

Figure S2 The compare energy between indirect (a) and direct (b) of Cr-Fe dimer. The reference energy for indirect case is set zero.
